# Supplementary material
Source: PubMed Central journal article supplement (PMC7199401)
Supplement: JVI.00148-20-s0001.pdf [file JVI.00148-20-s0001.pdf]

## **SUPPLEMENTAL MATERIAL**

### **Synthetic Chemistry**

All reagents were purchased from commercially available sources and used as received. Reactions were magnetically stirred under a nitrogen atmosphere, unless otherwise noted and reactions were monitored by either thin layer chromatography (TLC) with 0.25 mm E. Merck pre-coated silica gel plates or liquid chromatography mass spectrometry (LCMS). Proton ( $^1\text{H}$ ) and carbon ( $^{13}\text{C}$ ) NMR spectra were recorded on a Bruker Avance III 500-MHz spectrometer or on a Bruker DRX500 500-MHz spectrometer. Chemical shifts ( $\delta$ ) are reported in parts per million (ppm) relative to chloroform ( $\delta$  7.26) for  $^1\text{H}$  NMR, and ( $\delta$  77.0) for  $^{13}\text{C}$  NMR. Infrared spectra were recorded using a JASCO 480-Plus FT-IR spectrometer, or a Perkin-Elmer Spectrum Two FT-IR spectrometer. Accurate mass measurement data were acquired on Waters Instruments. Waters software calibrates and reports by use of neutral atomic masses. The mass of the electron is not included. Preparative scale HPLC was pre-formed with a Gilson 333/334 preparative pump system equipped with a 5 mL injection loop, Sunfire C18 OBD column (5  $\mu\text{m}$  packing material, 19 x 100 mm column dimensions) equipped with a UV-Vis dual wavelength (210 and 254 nm) detector and 215 liquid handling module. Solvent systems were comprised of  $\text{H}_2\text{O}$  containing 0.1% trifluoroacetic acid, and acetonitrile containing 0.1% trifluoroacetic acid. Lyophilization was performed in a Labconco FreeZone 12 Plus lyophilizer (0.035 mbar). The purity of new compounds was judged by NMR.

### **Synthesis of AEG-II-159**

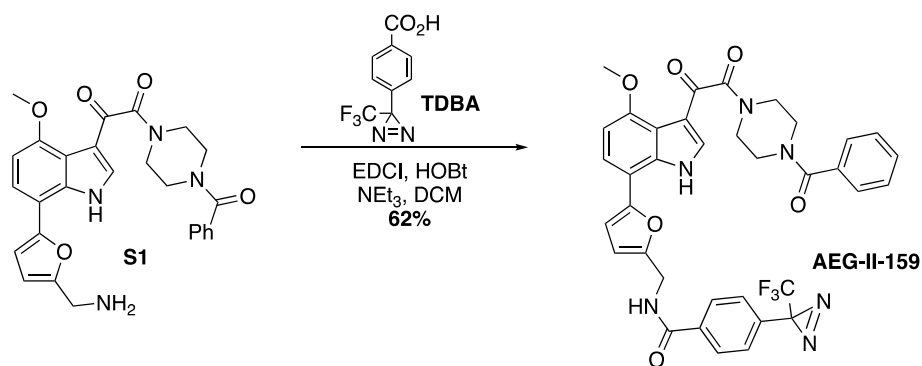

To a solution of **S1** (0.074 g, 0.15 mmol) (58), TDBA (0.052 g, 0.23 mmol, 1.5 eq.), EDCI•HCl (0.071 g, 0.46 mmol, 3 eq.), and HOBT•H<sub>2</sub>O (0.070 g, 0.46 mmol, 3 eq.) in CH<sub>2</sub>Cl<sub>2</sub> (6.8 mL) in a round bottom flask shielded from light under N<sub>2</sub> was added NEt<sub>3</sub> (0.11 mL, 0.76 mmol, 5 eq.). After 90 min, no starting material was observed by TLC. The crude reaction mixture was purified by flash column chromatography (SiO<sub>2</sub>, 50-100% EtOAc/Hexanes) to afford **AEG-II-159** as a (0.066 g, 62%) yellow solid.

**<sup>1</sup>H NMR** (500 MHz, CDCl<sub>3</sub>) δ 11.26 (s, 1 H), 8.15 (d, 1 H, *J* = 3.3 Hz), 7.82 (app. d, 1 H, *J* = 6.6 Hz), 7.42 (br. s, 5 H), 7.38 (d, 1 H, *J* = 8.3 Hz), 7.20 (d, 2 H, *J* = 8.2 Hz), 7.07 (t, 1 H, *J* = 6.2 Hz), 6.66 (d, 1 H, *J* = 8.3 Hz), 6.52 (d, 1 H, *J* = 3.3 Hz), 6.33 (d, 1 H, *J* = 3.3 Hz), 4.66 (d, 2 H, *J* = 6.1 Hz), 3.91 (s, 3 H), 3.97-3.38 (m, 8 H).

**<sup>13</sup>C NMR** (500 MHz, CDCl<sub>3</sub>): 170.9, 167.9, 167.8, 153.8, 152.9, 149.6, 135.7, 135.2, 134.9, 134.4, 133.0, 130.3, 128.8, 127.7, 127.2, 126.8, 120.9, 120.3, 115.6, 115.1, 109.5, 109.4, 103.9, 77.4, 56.1, 37.4, 29.9, 28.6, 28.3.

**IR**  $\nu_{\text{max}}$  3849, 3404, 2917, 2849, 2359, 1629, 1577, 1541, 1511, 1467, 1432, 1284, 1155

HRMS (ESI)  $m/z$  699.2180 [calcd for (M+H)<sup>+</sup> 699.2179]

### Synthesis of AEG-II-168

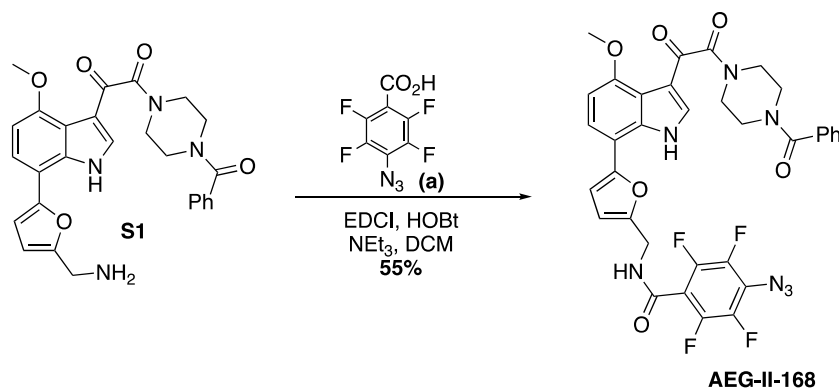

To a solution of **S1** (0.100 g, 0.206 mmol), **(a)** (0.073 g, 0.31 mmol, 1.5 eq.), EDCI•HCl (0.096 g, 0.62 mmol, 3 eq.), and HOBT•H<sub>2</sub>O (0.095 g, 0.62 mmol, 3 eq.) in CH<sub>2</sub>Cl<sub>2</sub> (6.8 mL) in a round bottom flask shielded from light under N<sub>2</sub> was added NEt<sub>3</sub> (0.14 mL, 1.03 mmol, 5 eq.). The reaction was allowed to proceed overnight. The crude reaction mixture was concentrated, and purified by flash column chromatography (SiO<sub>2</sub>, 60-100% EtOAc/Hexanes) to afford **AEG-II-168** (0.080 g, 55%) as a viscous orange oil.

**<sup>1</sup>H NMR** (500 MHz, CDCl<sub>3</sub>) δ 10.95 (s, 1 H), 8.06 (app. s, 1 H), 7.43 (m, 5 H), 7.20 (m, 1 H), 6.68 (d, 1 H,  $J = 8.3$  Hz), 6.56 (d, 1 H,  $J = 3.3$  Hz), 6.37 (d, 1 H,  $J = 3.3$  Hz), 4.68 (d, 2 H,  $J = 6.1$  Hz), 3.90 (s, 3 H), 3.97-3.30 (m, 8 H).

**<sup>13</sup>C NMR** (500 MHz, CDCl<sub>3</sub>): 185.8, 170.8, 167.6, 159.3, 153.7, 152.9, 148.9, 145.3, 139.4, 139.3, 136.1, 134.9, 139.3, 136.1, 134.9, 134.2, 130.2, 128.7, 127.1, 122.3, 120.5,

115.3, 114.8, 110.6, 110.4, 110.3, 109.7, 109.2, 109.1, 108.9, 104.1, 103.9, 55.9, 41.6, 37.3, 29.7

IR  $\nu_{\max}$  3299, 2918, 2849, 2360, 2341, 2128, 1631, 1545, 1510, 1486, 1429, 1401, 1364, 1271, 1131

HRMS (ESI)  $m/z$  704.1859 [calcd for  $C_{34}H_{25}F_4N_7O_6$  (M+H)<sup>+</sup> 704.1881]

### Synthesis of AEG-III-032

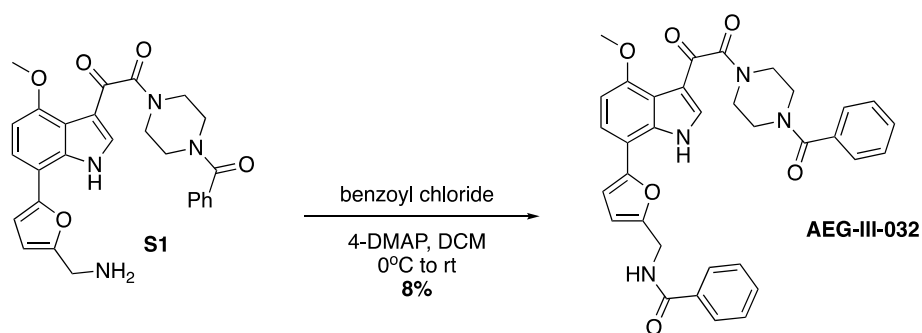

To a solution of **S1** (0.039 g, 0.081 mmol) in  $CH_2Cl_2$  (2 mL) under  $N_2$  at 0°C was added 4-DMAP (0.020 g, 0.16 mmol, 2 eq.). After 10 min, benzoyl chloride was added (0.023 g, 0.16 mmol, 2 eq.) and the reaction was allowed to gradually warm to room temperature overnight. The crude reaction mixture was concentrated and subjected to flash column chromatography ( $SiO_2$ , 50% EtOAc/Hexanes – 20% MeOH/EtOAc), concentrated, dissolved in 1.5 mL ACN + 0.8 mL water, and further purified by reverse phase HPLC (15 mL/min 45-80% ACN/ $H_2O$  + 0.1% TFA, 6 min) to afford **AEG-III-032** (0.004 g, 8%).

<sup>1</sup>H NMR (500 MHz,  $CDCl_3$ )  $\delta$  11.31 (s, 1 H), 8.21 (s, 1 H), 7.80 (d, 1 H,  $J = 7.3$  Hz), 7.52 (t, 1 H,  $J = 7.5$  Hz), 7.43 (m, 8 H), 6.99 (t, 1 H,  $J = 6.4$  Hz), 6.69 (d, 1 H,  $J = 8.3$  Hz), 6.53

(d, 1 H,  $J = 3.3$  Hz), 6.34 (d, 1 H,  $J = 3.3$  Hz), 4.69 (d, 1 H,  $J = 6.1$  Hz), 3.93 (s, 3 H), 3.99-3.39 (m, 8 H).

$^{13}\text{C}$  NMR (500 MHz,  $\text{CDCl}_3$ ): 171.5, 169.6, 167.9, 158.6, 158.3, 153.9, 152.9, 149.7, 136.1, 134.5, 133.7, 132.4, 130.6, 129.0, 128.9, 127.2, 127.2, 120.4, 116.0, 115.7, 115.0, 113.7, 109.6, 109.4, 104.1, 103.9, 56.1, 37.4

IR  $\nu_{\text{max}}$  3434, 2360, 2095, 1645, 1517, 1432, 1272, 1206, 1147, 916

HRMS (ESI)  $m/z$  591.2265 [calcd for  $\text{C}_{34}\text{H}_{30}\text{N}_4\text{O}_6$  ( $\text{M}+\text{H}$ ) $^+$  591.2244]

### Synthesis of S4

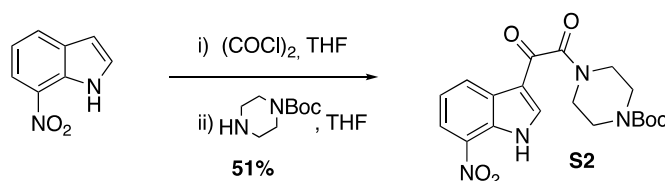

To 7-nitroindole (0.50 g, 3.1 mmol) in THF (8 mL) under  $\text{N}_2$  at room temperature was added oxalyl chloride (1.4 mL, 15.4 mmol, 5 eq.). After 23 hours the crude reaction mixture was concentrated and redissolved in THF under  $\text{N}_2$ . To this solution was added 1-boc-piperazine (0.69 g, 3.7 mmol, 1.2 eq.) then  $\text{NEt}_3$  (1.2 mL, 6.16 mmol, 2 eq.). The reaction was allowed to proceed for 24 h. The crude reaction mixture was diluted with  $\text{CH}_2\text{Cl}_2$  and washed with  $\text{NaHCO}_3$ . The organic layer was dried with  $\text{MgSO}_4$ , decanted, and concentrated. The crude reaction mixture was purified using flash column

chromatography (SiO<sub>2</sub>, 0-100% EtOAc/Hexanes) to afford **S2** as a (0.626 g, 51%) yellow solid.

**<sup>1</sup>H NMR** (500 MHz, CDCl<sub>3</sub>) δ 10.56 (s, 1 H), 8.76 (d, 1 H, *J* = 7.9 Hz), 8.28 (d, 1 H, *J* = 8.1 Hz), 8.21 (d, 1 H, *J* = 3.1 Hz), 7.47 (app. t, 1 H, *J* = 8.0 Hz), 3.75 (m, 2 H), 3.58 (m, 2 H), 3.55-3.47 (m, 4 H).

**<sup>13</sup>C NMR** (500 MHz, CDCl<sub>3</sub>): 185.3, 165.3, 154.6, 137.0, 133.6, 130.5, 129.8, 128.8, 123.1, 121.2, 115.7, 80.8, 46.2, 41.8, 28.5

**IR** ν<sub>max</sub> 3273, 2976, 1699, 1634, 1532, 1485, 1412, 1364, 1332, 1302, 1286, 1249, 1166, 1125, 1063, 1035, 995, 974, 928, 863, 810, 795, 772, 734, 659

**HRMS** (ESI) *m/z* 425.1255 [calcd for C<sub>19</sub>H<sub>22</sub>N<sub>4</sub>O<sub>6</sub> (M+Na) 425.1437]

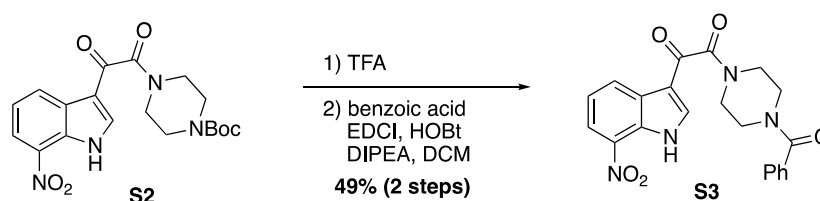

To a solution of **S2** (0.386 g, 0.959 mmol) in CH<sub>2</sub>Cl<sub>2</sub> (6.5 mL) was added TFA (1.5 mL, 1.5 mL / mmol). After four hours, no starting material was observed by LC/MS. The reaction mixture was concentrated repeatedly with CH<sub>2</sub>Cl<sub>2</sub>. The crude product was then put under N<sub>2</sub> atmosphere and dissolved in CH<sub>2</sub>Cl<sub>2</sub> (10 mL). To this solution was added

benzoic acid (0.129 g, 1.05 mmol, 1.1 eq.), EDCI•HCl (0.203 g, 1.05 mmol, 1.1 eq.), and HOBT•H<sub>2</sub>O (0.142 g, 1.05 mmol, 1.1 eq). After 25 minutes NEt<sub>3</sub> was added and to the reaction mixture, and the reaction was allowed to proceed overnight. The crude reaction mixture was washed with NaHCO<sub>3</sub> then NH<sub>4</sub>Cl. The organic layer was dried with MgSO<sub>4</sub>, decanted, and concentrated. The crude reaction mixture was purified using flash column chromatography (SiO<sub>2</sub>, 50% EtOAc/Hexanes – 10% MeOH/EtOAc) to afford **S3** as a (186 mg, 49%) yellow solid.

**<sup>1</sup>H NMR** (500 MHz, CDCl<sub>3</sub>) δ 10.58 (s, 1 H), 8.74 (s, 1 H), 8.27 (d, 1 H, *J* = 8.1 Hz), 8.23 (d, 1 H, *J* = 2.9 Hz), 7.45 (m, 6 H), 4.08-3.41 (m, 8 H).

**<sup>13</sup>C NMR** (500 MHz, CDCl<sub>3</sub>): 185.0, 170.9, 165.2, 137.2, 135.0, 133.6, 130.4, 129.8, 128.9, 128.8, 127.2, 123.2, 121.3, 115.6, 42.1, 29.9

**IR**  $\nu_{\max}$  3449, 2925, 2854, 1741, 1631, 1532, 1438, 1369, 1333, 1251, 1116, 1050, 975, 792, 736, 440, 425, 410

**HRMS** (ESI) *m/z* 407.1341 [calcd for C<sub>21</sub>H<sub>18</sub>N<sub>4</sub>O<sub>5</sub> (M+H) 407.1355]

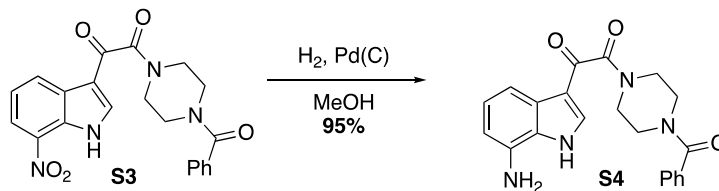

To a solution of **S3** (0.186 g, 0.458 mmol) in methanol (10 mL) under N<sub>2</sub> was added Pd/C (0.010 g). H<sub>2</sub> gas was then bubbled into the solution and the reaction was allowed to stir overnight. The crude reaction mixture was filtered through sand and concentrated to afford **S4** (163 mg, 95%) as an olive green solid.

**<sup>1</sup>H NMR** (500 MHz, CDCl<sub>3</sub>) δ 10.89 (s, 1 H), 7.64 (app. s, 1 H), 7.40 (m, 6 H), 7.07 (t, 1 H, *J* = 7.7 Hz), 6.56 (d, 1 H, *J* = 7.6 Hz), 3.49 (s, 2 H), 3.94-3.32 (m, 8 H).

**<sup>13</sup>C NMR** (500 MHz, CDCl<sub>3</sub>): 185.0, 171.0, 167.2, 135.2, 134.8, 132.8, 130.5, 129.8, 128.9, 127.2, 127.0, 126.3, 124.7, 114.6, 112.1, 110.2, 51.0, 46.3, 41.7

**IR**  $\nu_{\max}$  3583, 3366, 3237, 2914, 1717, 1621, 1522, 1434, 1251, 1158, 1003, 427

**HRMS** (ESI) *m/z* 377.1600 [calcd for C<sub>21</sub>H<sub>20</sub>N<sub>4</sub>O<sub>3</sub>(M+H)<sup>+</sup> 377.1614]

### Synthesis of AEG-III-087

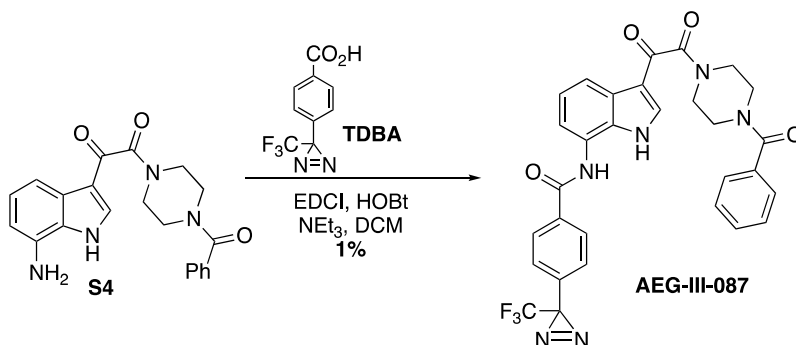

To a solution of **S4** (0.156 g, 0.414 mmol), TDBA (0.143 g, 0.622 mmol, 1.5 eq.), EDCI•HCl (0.119 g, 0.622 mmol, 1.5 eq.), and HOBT•H<sub>2</sub>O (0.095 g, 0.622 mmol, 1.5 eq.)



in CH<sub>2</sub>Cl<sub>2</sub> (18.4 mL) in a round bottom flask shielded from light under N<sub>2</sub> was added NEt<sub>3</sub> (0.11 mL, 0.828 mmol, 2 eq.). After 18 h, the crude reaction material was concentrated, dissolved in 1:1 ACN/H<sub>2</sub>O and purified using reverse phase HPLC (15 mL/min 20-95% ACN/H<sub>2</sub>O + 0.1% TFA, 15 min) to afford **AEG-III-087** as a green-yellow solid (3.4 mg, 1.4%).

**<sup>1</sup>H NMR** (500 MHz, CDCl<sub>3</sub>) δ 9.10 (s, 1 H), 8.10 (s, 1 H), 8.00(d, 2 H, *J* = 8.1 Hz), 7.64 (s, 1 H), 7.43 (m, 5 H), 7.30 (d, 2 H, *J* = 8.1 Hz), 7.20 (m, 1 H), 7.01 (d, 1 H, *J* = 7.6 Hz), 4.02-3.33 (m, 8 H)

**<sup>13</sup>C NMR** (500 MHz, CDCl<sub>3</sub>): 184.9, 171.3, 166.7, 165.2, 135.6, 134.7, 134.5, 133.5, 130.6, 130.5, 128.9, 128.7, 128.2, 127.7, 127.2, 126.9, 126.5, 123.6, 123.1, 122.9, 120.9, 119.9, 116.8, 114.2, 41.8, 29.9, 28.7, 28.4, 28.0

**IR**  $\nu_{\max}$  3281, 2923, 2861, 1784, 1717, 1627, 1429, 1250, 1156, 999, 939, 440, 425, 409

**HRMS** (ESI) *m/z* 589.1798 [calcd for C<sub>30</sub>H<sub>23</sub>F<sub>3</sub>N<sub>6</sub>O<sub>4</sub> (M+H)<sup>+</sup> 589.1811]

### **Synthesis of AEG-III-095**

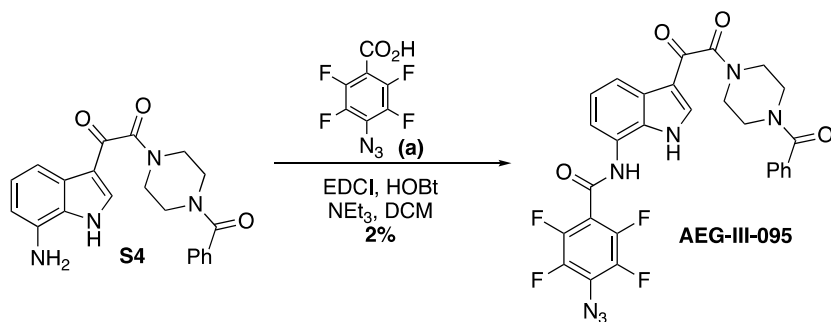

To a solution of **(a)** (0.024 g, 0.10 mmol, 1.5 eq.) in CH<sub>2</sub>Cl<sub>2</sub> (4 mL) in a round bottom flask shielded from light under N<sub>2</sub> at 0°C was added EDCI•HCl (0.016 g, 0.010 mmol, 1.5 eq.), HOBT•H<sub>2</sub>O (0.015 g, 0.10 mmol, 1.5 eq.), NEt<sub>3</sub> (0.02 mL, 0.13 mmol, 2 eq.), then **S4** (0.025 g, 0.066 mmol). The reaction mixture was allowed to gradually warm to room temperature overnight. The crude reaction mixture was concentrated, dissolved in 1:1 ACN/H<sub>2</sub>O, and purified using reverse phase HPLC (15 mL/min 20-95% ACN/H<sub>2</sub>O + 0.1% TFA, 15 min) to afford **AEG-III-095** as a green-yellow solid (0.68 mg, 2%).

**<sup>1</sup>H NMR** (500 MHz, CDCl<sub>3</sub>) δ 10.47 (s, 1 H), 8.80 (s, 1 H), 8.24 (s, 1 H), 7.81 (s, 1 H), 7.45 (m, 5 H), 6.96 (d, 1 H, *J* = 7.6 Hz), 4.03-3.40 (m, 8 H).

**<sup>13</sup>C NMR** (500 MHz, CDCl<sub>3</sub>): 184.7, 171.0, 166.4, 156.3, 135.5, 134.5, 130.4, 128.8, 128.1, 127.8, 127.1, 123.5, 121.8, 120.5, 116.4, 114.3, 29.7

**IR**  $\nu_{\max}$  3265, 2359, 2127, 1634, 1486, 1422, 1257, 1157, 999, 912, 731, 668

**HRMS** (ESI) *m/z* 594.1520 [calcd for C<sub>28</sub>H<sub>19</sub>F<sub>4</sub>N<sub>7</sub>O<sub>4</sub> (M+H)<sup>+</sup> 594.1513]

## Synthesis of AEG-III-096

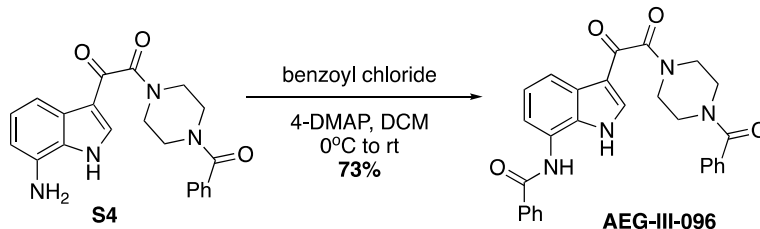

To a solution of **S4** (0.044 g, 0.12 mmol) in CH<sub>2</sub>Cl<sub>2</sub> (2.5 mL) under N<sub>2</sub> at 0°C was added benzoyl chloride (0.049 g, 0.35 mmol, 3 eq.), then 4-DMAP (0.043 g, 0.35 mmol, 3 eq.). The reaction mixture was allowed to gradually warm to room temperature overnight. After 15 h, the crude reaction mixture was purified using flash column chromatography (SiO<sub>2</sub>, 0-100% EtOAc/Hex) to afford **AEG-III-096** (0.041 g, 73%) as a white solid.

**<sup>1</sup>H NMR** (500 MHz, CDCl<sub>3</sub>) δ 11.07 (s, 1 H), 8.95 (s, 1 H), 8.10 (s, 1 H), 7.96 (d, 1 H, *J* = 7.6 Hz), 7.70 (s, 1 H), 7.58 (t, 1 H, *J* = 7.5 Hz), 7.40 (m, 5 H), 7.18 (app. s, 1 H), 7.06 (d, 1 H, *J* = 7.51 Hz), 3.93-3.29 (m, 8 H).

**<sup>13</sup>C NMR** (500 MHz, CDCl<sub>3</sub>): 185.1, 170.9, 166.6, 166.4, 135.6, 135.0, 133.8, 132.5, 130.4, 129.0, 128.9, 128.8, 127.7, 127.2, 123.5, 123.4, 119.5, 116.6, 114.4, 29.9

**IR**  $\nu_{\text{max}}$  3283, 1629, 1528, 1425, 1251, 1157, 998, 710, 427

**HRMS** (ESI) *m/z* 481.1876 [calcd for C<sub>28</sub>H<sub>24</sub>N<sub>4</sub>O<sub>4</sub> (M+H)<sup>+</sup> 481.1876]
